# Supplementary material for: Managing Liquidity
Source: Atypon-hosted journal article supplement (doi:10.1287/mnsc.2022.4559), 2022-09-30
Supplement: mnsc.2022.4559.sm1.pdf [file mnsc.2022.4559.sm1.pdf]

## Online Appendix to

“Managing Liquidity” in *Management Science*

by Zhixiong Zeng and Yi Jin

### PROOF OF PROPOSITIONS AND LEMMAS

#### Proof of Lemma 1:

Substituting (2) into (1) and (4) into (3), we have

$$W_j(z_t) = z_t - \tau_t + \max_{m_{jt}, a_{jt}, k_{jt}} \{g(k_{jt}) - q_t k_{jt} - m_{jt} - a_{jt} + V_j(m_{jt}, a_{jt}, k_{jt})\} \quad (\text{A1})$$

$$W(z_t) = z_t - \tau_t + \max_{m_t, a_t, k_t} \{g(k_t) - q_t k_t - m_t - a_t + \rho V_0(m_t, a_t, k_t) + (1 - \rho) V_1(m_t, a_t, k_t)\} \quad (\text{A2})$$

The first-order conditions for  $k_{jt}$  in (A1) and the first-order condition for  $k_t$  in (A2) are respectively

$$g'(k_{jt}) - q_t + \frac{\partial}{\partial k_j} V_j(m_{jt}, a_{jt}, k_{jt}) \leq 0, \quad = 0 \text{ if } k_{jt} > 0, \quad (\text{A3})$$

$$g'(k_t) - q_t + \rho \frac{\partial}{\partial k} V_0(m_t, a_t, k_t) + (1 - \rho) \frac{\partial}{\partial k} V_1(m_t, a_t, k_t) \leq 0, \quad = 0 \text{ if } k_t > 0. \quad (\text{A4})$$

Applying the envelope theorem to (5), (A1), and (A2) yields

$$\begin{aligned} \frac{\partial}{\partial k_j} V_j(m_{jt}, a_{jt}, k_{jt}) &= \beta \left\{ \theta \left[ \rho \frac{\partial}{\partial k_j} W_0(z_{j,t+1}) + (1 - \rho) \frac{\partial}{\partial k_j} W_1(z_{j,t+1}) \right] + (1 - \theta) \frac{\partial}{\partial k_j} W(z_{j,t+1}) \right\} \\ &= \beta q_{t+1}, \end{aligned}$$

and

$$\frac{\partial}{\partial k} V_j(m_t, a_t, k_t) = \beta q_{t+1}.$$

Inada conditions on  $g(\cdot)$  guarantee  $k_{jt}, k_t > 0$ . Hence both (A3) and (A4) hold with equality, implying  $k_{1t} = k_{2t} = k_t$ . Therefore, (14) obtains for buyers either with or without perfect information. Below, we analyze the agents' consumption and liquidity-holding decisions. We omit the time subscripts to avoid the cluttering of notations.

*Perfect-information buyers*

The first-order conditions for  $m_j$  and  $a_j$  in (A1) are respectively

$$-1 + \frac{\partial}{\partial m_j} V_j(m_j, a_j, k_j) \leq 0, \quad = 0 \text{ if } m_j > 0, \quad (\text{A5})$$

$$-1 + \frac{\partial}{\partial a_j} V_j(m_j, a_j, k_j) \leq 0, \quad = 0 \text{ if } a_j > 0. \quad (\text{A6})$$

Recall that if liquidity is plentiful, i.e.,  $\beta(m_j/\pi + jra_j) \geq x^*$ , then  $x_j = x^*$ ; If liquidity is scarce, i.e.,  $\beta(m_j/\pi + jra_j) < x^*$ , then  $x_j = \beta(m_j/\pi + jra_j)$ . Applying the envelope theorem to (5) and (A1) gives

$$\frac{\partial}{\partial m_j} V_j(m_j, a_j, k_j) = \frac{\beta}{\pi}, \quad \frac{\partial}{\partial a_j} V_j(m_j, a_j, k_j) = \beta r$$

for the plentiful-liquidity case, and

$$\frac{\partial}{\partial m_j} V_j(m_j, a_j, k_j) = u'(x_j) \frac{\beta}{\pi}, \quad \frac{\partial}{\partial a_j} V_j(m_j, a_j, k_j) = u'(x_j) j\beta r + (1-j)\beta r$$

for the scarce-liquidity case. Combining the above results yields

$$\begin{aligned} \frac{\partial}{\partial m_j} V_j(m_j, a_j, k_j) &= \frac{\beta}{\pi} \max \langle u'(x_j), 1 \rangle, \\ \frac{\partial}{\partial a_j} V_j(m_j, a_j, k_j) &= \beta r \max \langle ju'(x_j) + 1 - j, 1 \rangle. \end{aligned}$$

Plugging these back to (A5) and (A6) and rearranging, we arrive at (12) and (13). For the arbitrage condition (15), see footnote 16.

#### *Imperfect information buyers*

The first-order conditions for  $m$  and  $a$  in (A2) are

$$-1 + \rho \frac{\partial}{\partial m} V_0(m, a, k) + (1-\rho) \frac{\partial}{\partial m} V_1(m, a, k) \leq 0, \quad = 0 \text{ if } m > 0, \quad (\text{A7})$$

$$-1 + \rho \frac{\partial}{\partial a} V_0(m, a, k) + (1-\rho) \frac{\partial}{\partial a} V_1(m, a, k) \leq 0, \quad = 0 \text{ if } a > 0. \quad (\text{A8})$$

Applying the envelope theorem, we have

$$\begin{aligned} \frac{\partial}{\partial m} V_j(m, a, k) &= \frac{\beta}{\pi} \max \langle u'(\tilde{x}_j), 1 \rangle \\ \frac{\partial}{\partial a} V_j(m, a, k) &= \beta r \max \langle ju'(\tilde{x}_j) + 1 - j, 1 \rangle \end{aligned}$$

where  $\tilde{x}_j$  denotes DM consumption of an imperfect-information buyer in type- $j$  meeting. Plugging the above back to (A7) and (A8) and rearranging, we obtain

$$\rho [u'(\tilde{x}_{0t}) - 1] + (1-\rho) [u'(\tilde{x}_{1t}) - 1] \leq \frac{\pi_t}{\beta} - 1, \quad = \text{ if } m_t > 0 \quad (16)$$

$$(1 - \rho) [u'(\tilde{x}_{1t}) - 1] \leq \frac{1}{\beta r_t} - 1, \quad = \text{ if } a_t > 0 \quad (17)$$

Inada conditions on  $u(\cdot)$  imply that (16) holds with equality. Since  $\tilde{x}_0 = \tilde{x}_1 = x_0$  in the case of single-liquidity holding, the equality version of (16) coincides with the equality version of (12) with  $j = 0$ , which is simply equation (19). Mixed-liquidity holding requires (17) to hold with equality as well. Thus,  $\tilde{x}_0$  and  $\tilde{x}_1$  satisfy

$$u'(\tilde{x}_1) - 1 = \frac{1/r - \beta}{(1 - \rho)\beta}, \quad (A9)$$

$$u'(\tilde{x}_0) - 1 = \frac{\pi - 1/r}{\rho\beta}. \quad (A10)$$

One can easily show that the condition  $\tilde{x}_1 > \tilde{x}_0 > x^*$  implies

$$r_t > \frac{1}{\rho\beta + (1 - \rho)\pi_t}. \quad (18)$$

*Q.E.D.*

### **Proof of Lemma 2:**

Let  $W^e(k_{t-1}^e, l_{t-1}^e)$  be the entrepreneur's value function for period  $t$ , where  $k_{t-1}^e$  is the existing capital stock and  $l_{t-1}^e$  is the previous-period loan. Using the flow-of-funds constraint (21) to substitute out  $c_t^e$ , the entrepreneur's Bellman equation is then

$$W^e(k_{t-1}^e, l_{t-1}^e) = \max_{k_t^e, l_t^e} \{f(k_t^e) + q_t k_{t-1}^e + l_t^e - q_t k_t^e - r_{t-1} l_{t-1}^e + \eta W^e(k_t^e, l_t^e)\}$$

subject to the debt constraint (22). Let  $\lambda_t$  be the Lagrangian multiplier for (22). The first-order conditions with respect to  $l_t^e$  and  $k_t^e$  are

$$1 + \eta \frac{\partial}{\partial l^e} W^e(k_t^e, l_t^e) - \lambda_t r_t = 0,$$

$$f'(k_t^e) - q_t + \eta \frac{\partial}{\partial k^e} W^e(k_t^e, l_t^e) + \lambda_t \sigma^e q_{t+1} = 0.$$

Substitution of the envelope conditions,  $\partial W^e(k_{t-1}^e, l_{t-1}^e) / \partial l^e = -r_{t-1}$  and  $\partial W^e(k_{t-1}^e, l_{t-1}^e) / \partial k^e = q_t$ , into the above two conditions yield

$$1 = \eta r_t + \lambda_t r_t, \quad (A11)$$

$$q_t = f'(k_t^e) + \zeta_t q_{t+1}, \quad (23)$$

where

$$\zeta_t \equiv \eta + \sigma^e \lambda_t.$$

Inserting  $\lambda_t = 1/r_t - \eta$ , as implied by (A11), into the expression for  $\zeta_t$  gives (24). Given  $r_t$  that satisfies (15), we have  $\lambda_t \geq \beta - \eta > 0$ . Hence constraint (22) binds. *Q.E.D.*

**Proof of Proposition 1:**

Asset-market clearing implies  $l^e + \bar{b} = \theta(1 - \rho)a_1 + (1 - \theta)a$ . So the response of  $l^e + \bar{b}$  to  $r$  can be seen from the responses of  $a_1$  and  $a$ . Perfect-information buyers hold no liquid debt in type-0 meetings as long as  $r$  is strictly less than  $1/\beta$ . In type-1 meetings,  $a_1$  and  $x_1$  satisfy the equality version of (13) with  $j = 1$  and  $a_1 = x_1/(\beta r)$ . It follows that

$$\frac{dx_1}{d(1/r)} = \frac{1}{\beta} \frac{1}{u''(x_1)} < 0,$$

$$\frac{da_1}{d(1/r)} = \frac{1}{\beta} \left[ x_1 + \frac{u'(x_1)}{u''(x_1)} \right] = \frac{1}{\beta} \frac{u'(x_1)}{u''(x_1)} \left[ x_1 \frac{u''(x_1)}{u'(x_1)} + 1 \right] < 0,$$

where the last inequality obtains due to the assumption that  $-xu''(x)/u'(x) < 1$ . Imperfect-information buyers demand positive amounts of liquid debt only in the mixed holding regime, where  $\tilde{x}_0$  and  $\tilde{x}_1$  satisfy (A9) and (A10), and  $a = (\tilde{x}_1 - \tilde{x}_0)/(\beta r)$ . Hence,

$$\frac{d\tilde{x}_0}{d(1/r)} = \frac{1}{\rho\beta} \frac{-1}{u''(\tilde{x}_0)} > 0,$$

$$\frac{d\tilde{x}_1}{d(1/r)} = \frac{1}{(1-\rho)\beta} \frac{1}{u''(\tilde{x}_1)} < 0,$$

and

$$\beta \frac{da}{d(1/r)} = \frac{u'(\tilde{x}_1)}{u''(\tilde{x}_1)} \left[ \tilde{x}_1 \frac{u''(\tilde{x}_1)}{u'(\tilde{x}_1)} + 1 \right] + \frac{\rho}{1-\rho} \frac{1}{u''(\tilde{x}_1)} - \left[ \tilde{x}_0 + \frac{1}{r} \frac{d\tilde{x}_0}{d(1/r)} \right] < 0.$$

Therefore,

$$\frac{d(l^e + \bar{b})}{d(1/r)} = \frac{d[\theta(1-\rho)a_1 + (1-\theta)a]}{d(1/r)} < 0.$$

To prove  $dl^e/d(1/r) > 0$ , we first differentiate condition (26) to obtain

$$\frac{dk^e}{d(1/r)} = - \frac{\sigma^e g'(K - k^e)}{(1-\beta)f''(k^e) + (1-\zeta)g''(K - k^e)} > 0.$$

Then, we use (31) and (26) to rewrite the real quantity of private debt as

$$l^e = \frac{\sigma^e}{1-\beta} k^e g'(K - k^e) \frac{1}{r},$$

and obtain

$$\frac{dl^e}{d(1/r)} = \frac{\sigma^e}{1-\beta} \left\{ k^e g'(K - k^e) + \frac{1}{r} [g'(K - k^e) + k^e g''(K - k^e)(-1)] \frac{dk^e}{d(1/r)} \right\} > 0$$

Finally, differentiating the asset-market clearing condition (30) yields

$$\frac{d\bar{b}}{d(1/r)} = \theta(1-\rho) \frac{da_1}{d(1/r)} + (1-\theta) \frac{da}{d(1/r)} - \frac{dl^e}{d(1/r)} < 0.$$

*Q.E.D.*

**Proof of Proposition 2:**

We have shown in the proof of Proposition 1 that  $dk^e/dr < 0$ . Then,

$$\frac{dS^{CM}}{dr} = [f'(k^e) - g'(K - k^e)] \frac{dk^e}{dr} = \frac{\beta - \zeta}{1 - \beta} g'(K - k^e) \frac{dk^e}{dr}.$$

Obviously,  $dS^{CM}/dr < 0$  when  $\beta > \zeta = (1 - \sigma^e)\eta + \sigma^e/r$ , or when  $r > r^{CM}$ , where

$$r^{CM} \equiv \frac{\sigma^e}{\beta - (1 - \sigma^e)\eta}.$$

Also,  $dS^{CM}/dr > 0$  when  $r < r^{CM}$ . One can also show that  $1/\beta - r^{CM} > 0$ , and hence  $r^{CM}$  satisfies the arbitrage condition (15). *Q.E.D.*

**Proof of Proposition 3:**

Let  $(\pi^*, r^*)$  be a solution to the problem under investigation. We first show that  $r^* < 1/\beta$ . It would be more convenient to write (15) as  $\beta \leq 1/r \leq \pi$ . Let  $\lambda_r$  and  $\lambda_\pi$  be the Lagrangian multipliers associated with the first and second inequalities, respectively. The Kuhn-Tucker condition with respect to  $\pi$  is

$$\begin{aligned} \lambda_\pi = & -\theta\rho [u'(x_0) - 1] \frac{\partial x_0}{\partial \pi} - \theta(1-\rho) [u'(x_1) - 1] \frac{\partial x_1}{\partial \pi} \\ & - (1-\theta)\rho [u'(\tilde{x}_0) - 1] \frac{\partial \tilde{x}_0}{\partial \pi} - (1-\theta)(1-\rho) [u'(\tilde{x}_1) - 1] \frac{\partial \tilde{x}_1}{\partial \pi} \end{aligned} \quad (\text{A12})$$

with the complementary slackness condition:

$$\lambda_\pi \left( \pi - \frac{1}{r} \right) = 0.$$

The Kuhn-Tucker condition with respect to  $1/r$  is

$$\begin{aligned} 0 = & [f'(k^e) - g'(k)] \frac{dk^e}{d(1/r)} \\ & + \theta\rho [u'(x_0) - 1] \frac{\partial x_0}{\partial (1/r)} + \theta(1-\rho) [u'(x_1) - 1] \frac{\partial x_1}{\partial (1/r)} \\ & + (1-\theta)\rho [u'(\tilde{x}_0) - 1] \frac{\partial \tilde{x}_0}{\partial (1/r)} + (1-\theta)(1-\rho) [u'(\tilde{x}_1) - 1] \frac{\partial \tilde{x}_1}{\partial (1/r)} \\ & + \lambda_r - \lambda_\pi \end{aligned} \quad (\text{A13})$$

with the complementary slackness condition:

$$\lambda_r \left( \frac{1}{r} - \beta \right) = 0.$$

There are two cases to consider.

Case one.  $\lambda_\pi = 0$ . In this case the right-hand side of condition (A13) is strictly positive when evaluated at  $r = 1/\beta$ , since  $f'(k^e) - g'(k) > 0$  and  $u'(x_1) - 1 = u'(\tilde{x}_1) - 1 = 0$  when  $r = 1/\beta$ . Furthermore,  $dk^e/d(1/r) > 0$  from (26),  $u'(x_0) - 1, u'(\tilde{x}_0) - 1 \geq 0$ ,  $\partial x_0/\partial(1/r) = 0$ ,  $\partial \tilde{x}_0/\partial(1/r) \geq 0$ , and  $\lambda_r \geq 0$ . These imply  $\lambda_\pi > 0$ : a contradiction! Hence  $r = 1/\beta$  violates condition (A13). It must be true that  $r^* < 1/\beta$ .

Case two.  $\lambda_\pi > 0$ . By the complementary slackness condition, we have  $1/r = \pi$ . If  $r = 1/\beta$ , then  $\pi = \beta$ . But this  $(\pi, r)$  pair implies  $u'(x_j) - 1 = u'(\tilde{x}_j) - 1 = 0$ ,  $j \in \{0, 1\}$ . Condition (A12) in turn implies  $\lambda_\pi = 0$ : again a contradiction! Hence in this case, it must also be true that  $r^* < 1/\beta$ .

We obtain stated result,  $\pi^* > \beta$ , by observing that if  $\pi^* = \beta$  then  $r^* = 1/\beta$  from (15). It follows immediately that the gross nominal illiquid rate  $\pi^*/\beta > 1$ . But, it should be noted that the nominal interest rate on liquid debt is zero under the optimal policy. To see this, observe that  $\pi^* > \beta$  implies  $u'(x_0) - 1 > 0$  and hence  $\lambda_\pi > 0$  in the light of (A12). The complementary slackness condition then implies  $\pi^* = 1/r^*$ , hence  $i^* \equiv r^*\pi^* = 1$ . *Q.E.D.*
